# Supplementary material for: Hydrogenation of CO 2 into formate using an iridium catalyst containing proton-responsive imidazoline–amide ligands
Source: Royal Society of Chemistry journal article supplement (doi:10.1039/d5cy00013k), 2025-01-01
Supplement: d5cy00013k1.pdf [file d5cy00013k1.pdf]

## **SUPPORTING INFORMATION**

### **Hydrogenation of CO<sub>2</sub> into formate using Iridium catalyst containing proton responsive imidazoline-amide ligands**

Supriyo Majumder,\* Rajkumar Das, Chanchal Samanta, Chiranjeevi Thota, and Bharat L Newalkar

BPCL-Corporate Research & Development Centre, Greater Noida, U.P., 201306, India.

Phone: +91-1202354198 and e-mail address: [supriyomajumder@bharatpetroleum.in](mailto:supriyomajumder@bharatpetroleum.in)

#### **Table of Contents**

|                                     |               |
|-------------------------------------|---------------|
| <b>1. Experimental section.....</b> | <b>S2-S3</b>  |
| <b>2. Table and Figure.....</b>     | <b>S4-S5</b>  |
| <b>3. Spectroscopic data.....</b>   | <b>S6-S11</b> |
| <b>4. References.....</b>           | <b>S12</b>    |

## 1. Experimental section

**General Methods:** Unless otherwise noted, chemicals were purchased from commercial suppliers (Sigma-Aldrich, Alfa Aesar, Loba, SD Fine and SRL Pvt. Ltd) and used without further purification. Carbon dioxide (purity 99.9%) and hydrogen (purity 99.9%) were sourced from Chemtron Science Laboratories Pvt. Ltd. All manipulations were carried out under laboratory atmosphere and all aqueous solutions were degassed by passing nitrogen prior to use. Synthesis of ligands were performed in oven-dried glassware flushed with nitrogen. However, all CO<sub>2</sub> hydrogenation reactions were performed in a 250 mL batch reactor (Parr Instruments, USA) flushed with nitrogen. <sup>1</sup>H NMR and <sup>13</sup>C NMR spectra were recorded in a Bruker Avance 600 spectrometer using appropriate (D<sub>2</sub>O, DMSO-d<sub>6</sub>) solvent. Formate concentrations were determined by <sup>1</sup>H NMR analysis using sodium acetate as internal standard. The GC-mass spectrometric analysis was carried out using High Resolution Q-TOF Mass Spectrometer, equipped FID detector and capillary column (SH-Rtx-1701, length 60 meter, inner diameter 0.25 mm, film 0.25 mm). TLC inspections were performed on Silica gel 60 F254 plates. Column chromatography was performed on silica gel (60-120 mesh) using ethyl acetate/n-hexane as eluent.

### Synthesis of Iridium catalysts

**ImA-1:** To a stirred solution of Cp\*Ir(OH<sub>2</sub>)<sub>3</sub>.SO<sub>4</sub> (320 mg, 0.67 mmol) in water was added imidazoline-amide<sup>1</sup> (126 mg, 0.67 mmol) and the mixture was stirred at room temperature for 16 hours. Then the solution was filtered, and the filtrate was concentrated under reduced pressure to yield **ImA-1** as a bright yellow solid (374 mg, 89%).

<sup>1</sup>H NMR (600 MHz, D<sub>2</sub>O):  $\delta$  (ppm) 1.34 (15H, s), 3.83 (2H, t,  $J$  = 10.2 Hz), 4.14 (2H, t,  $J$  = 10.2 Hz), 7.06 (2H, d,  $J$  = 7.2 Hz), 7.19 (1H, t,  $J$  = 7.2 Hz), 7.38 (2H, t,  $J$  = 7.8 Hz).

<sup>13</sup>C NMR (150 MHz, D<sub>2</sub>O):  $\delta$  (ppm) 8.1, 45.5, 52.0, 86.4, 125.6, 126.1, 129.0, 145.7, 164.6, 168.1

ESI-MS(+):  $m/z$  516 [(M-H<sub>2</sub>O-HSO<sub>4</sub><sup>-</sup>) + 1].

Anal. Calc. for C<sub>20</sub>H<sub>28</sub>IrN<sub>3</sub>O<sub>6</sub>S: C 38.09, H 4.47, N 6.66. Found: C 37.97, H 4.51, N 6.57

**ImA-2:** To a stirred solution of Cp\*Ir(OH<sub>2</sub>)<sub>3</sub>.SO<sub>4</sub> (34 mg, 0.0712 mmol) in water (15 mL) was added cyclohexyl imidazoline-amide<sup>2</sup> (17.3 mg, 0.0712 mmol) and the mixture was stirred at room temperature for 16 hours. Then the solution was filtered, and the filtrate was concentrated under reduced pressure to yield **ImA-2** as a bright yellow solid (42 mg, 92%).

<sup>1</sup>H NMR (600 MHz, D<sub>2</sub>O):  $\delta$  (ppm) 1.28–1.75 (8H, m), 1.32 (15H, s), 4.17–4.20 (1H, m), 4.36–4.37 (1H, m), 7.11 (2H, d,  $J$  = 7.2 Hz), 7.20 (1H, t,  $J$  = 7.8 Hz), 7.39 (2H, t,  $J$  = 8.4 Hz).

<sup>13</sup>C NMR (150 MHz, D<sub>2</sub>O):  $\delta$  (ppm) 8.0, 18.9, 19.5, 25.3, 26.7, 57.9, 62.0, 86.2, 125.5, 126.1, 129.0, 145.7, 165.2, 167.3

ESI-MS(+):  $m/z$  570 [(M-H<sub>2</sub>O-HSO<sub>4</sub><sup>-</sup>) + 1].

Anal. Calc. for C<sub>24</sub>H<sub>34</sub>IrN<sub>3</sub>O<sub>6</sub>S: C 42.09, H 5.00, N 6.14. Found: C 41.95, H 5.08, N 6.21

**ImA-3:** To a stirred solution of Cp\*Ir(OH<sub>2</sub>)<sub>3</sub>.SO<sub>4</sub> (68 mg, 0.143 mmol) in water (30 mL) was added benzimidazole-amide<sup>3</sup> (34 mg, 0.143 mmol) and the mixture was stirred at room temperature for 16 hours. Then the solution was filtered, and the filtrate was concentrated under reduced pressure to yield **ImA-3** as a bright yellow solid (65 mg, 81%).

**<sup>1</sup>H NMR (600 MHz, D<sub>2</sub>O):**  $\delta$  (ppm) 1.38 (15H, s), 7.22-7.26 (3H, m), 7.45 (2H, t,  $J$  = 7.8 Hz), 7.52 (2H, m), 7.72 (1H, d,  $J$  = 8.4 Hz), 7.85 (1H, d,  $J$  = 7.8 Hz).

**<sup>13</sup>C NMR (150 MHz, D<sub>2</sub>O):**  $\delta$  (ppm) 8.3, 86.8, 114.3, 116.7, 125.1, 125.7, 126.1, 129.2, 133.5, 137.8, 145.8, 151.0, 164.2

**ESI-MS(+):**  $m/z$  564 [(M-H<sub>2</sub>O-HSO<sub>4</sub><sup>-</sup>) + 1].

**Anal. Calc.** for C<sub>24</sub>H<sub>28</sub>IrN<sub>3</sub>O<sub>6</sub>S: C 42.47, H 4.16, N 6.19. Found: C 42.33, H 4.22, N 6.10

### Experimental Procedure: CO<sub>2</sub> hydrogenation to formate

In a typical experiment, a 250 mL batch reactor was charged with 2M KHCO<sub>3</sub> (60 mL), iridium catalyst (26  $\mu$ mol) and sealed. The vessel was purged with N<sub>2</sub> (3 times) and then pressurized with CO<sub>2</sub> followed by H<sub>2</sub> to the desired pressure. The temperature of the reaction mixture was increased to 50 °C. After stabilization at 50 °C under desired pressure of H<sub>2</sub>/CO<sub>2</sub> (1/1) for 5 min, the reaction was started by stirring at 500 rpm. The reaction was stopped after the desired time and the reaction mixture was cooled to room temperature. The reactor was depressurized carefully and the formate concentration was analyzed by <sup>1</sup>H NMR using sodium acetate as an internal standard.

### Integrated CO<sub>2</sub> capture and hydrogenation to formate

In a typical experiment, a 250 mL batch reactor was charged with Water (43.3 mL) and triethyl amine (16.7 mL). The vessel was sealed, purged with N<sub>2</sub> (3 times) and then pressurized with CO<sub>2</sub> (40 bar). The solution was stirred at 500 rpm for 2 hours. Then the reactor was opened, iridium catalyst ImA-1 (26  $\mu$ mol) was added and sealed. The vessel was again purged with N<sub>2</sub> (3 times) and then pressurized with H<sub>2</sub> to 40 bar. The temperature of the reaction mixture was increased to 120 °C. After stabilization at 120 °C for 5 min, the reaction was started by stirring at 500 rpm. The reaction was stopped after 24 hours and the mixture was cooled to room temperature. The reactor was depressurized carefully and the formate concentration was analyzed by <sup>1</sup>H NMR using sodium acetate as an internal standard.

**Table 1:** Formate formation in presence of different aqueous base.

| Entry | Aq. base              | Temp.(°C) | Total pressure(bar) | Formate (Molar) |
|-------|-----------------------|-----------|---------------------|-----------------|
| 1     | 1M NaOH               | 50        | 40                  | 0.60            |
| 2     | 1M KOH                | 50        | 40                  | 0.59            |
| 3     | 1M LiOH               | 50        | 40                  | 0.67            |
| 4     | 1M CsOH               | 50        | 40                  | 0.60            |
| 5     | 1M NaHCO <sub>3</sub> | 50        | 40                  | 0.41            |
| 6     | 2M KHCO <sub>3</sub>  | 50        | 40                  | 0.68            |

<sup>a</sup> Reaction conditions: Catalyst (**ImA-1**): 0.00026 M, P<sub>CO<sub>2</sub></sub> : P<sub>H<sub>2</sub></sub> = 1:1 (40 bar), temp: 50 °C, time: 6 h.

**Table 2:** Formate formation over time in presence of **ImA-1**, **ImA-2** and **ImA-3**

| Sl No | Time (h) | Formate Conc (M) (TON) |                   |                   |
|-------|----------|------------------------|-------------------|-------------------|
|       |          | Cat. <b>ImA-1</b>      | Cat. <b>ImA-2</b> | Cat. <b>ImA-3</b> |
| 1     | 1        | 0.202 (7770)           | 0.072 (2770)      | 0.050 (1923)      |
| 2     | 3        | 0.362 (13923)          | 0.145 (5577)      | 0.072 (2770)      |
| 3     | 6        | 0.500 (19231)          | 0.260 (10000)     | 0.087 (3346)      |
| 4     | 12       | 0.750 (28846)          | 0.492 (18923)     | 0.116 (4462)      |
| 5     | 18       | 0.942 (36231)          | 0.688 (26462)     | 0.145 (5577)      |
| 6     | 24       | 1.090 (41923)          | 0.811 (31192)     | 0.166 (6385)      |
| 7     | 36       | 1.304 (50154)          | 0.927 (35654)     | 0.174 (6692)      |
| 8     | 48       | 1.450 (55770)          | 0.992 (38154)     | 0.181 (6962)      |

Reaction conditions: Catalyst: 0.000026 M, P<sub>CO<sub>2</sub></sub> : P<sub>H<sub>2</sub></sub> = 1:1 (40 bar), temp. 50 °C,

**Table 3:** Formate formation as a function of pressure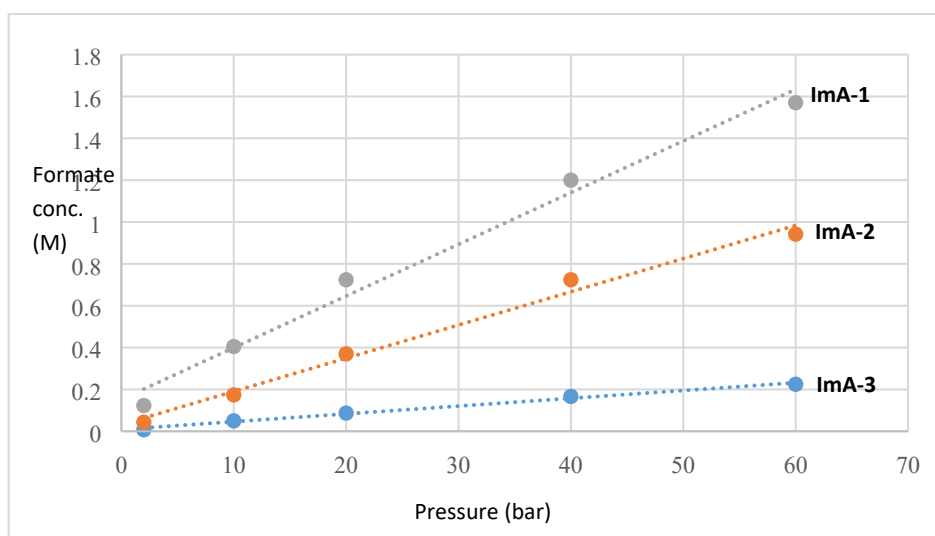

### Hydrogenation of impure stream of CO<sub>2</sub> into formate

| Sl No. | Impure CO <sub>2</sub> stream     | Formate conc. (M) |
|--------|-----------------------------------|-------------------|
| 1      | 40% CO <sub>2</sub> + 60% methane | 0.24              |

### Hydrogenation of CO<sub>2</sub> into formate under reduced pressure - Comparison of catalytic activities of Imidazoline-amide ligated and picolinamide ligated Ir-catalysts.

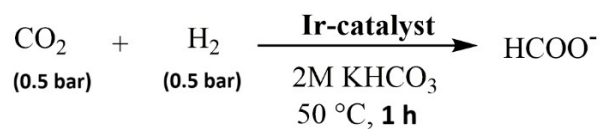

| Sl No. | Catalyst                                                                                                  | Formate Conc. (M) | TON |
|--------|-----------------------------------------------------------------------------------------------------------|-------------------|-----|
| 1      | 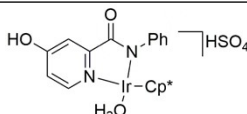<br><i>Fujita-Himeda</i> | 0.015             | 577 |
| 2      | <br><b>ImA-1</b>        | 0.014             | 539 |

### 3. Copies of NMR spectra of Ligands, Catalysts and Reaction mixtures

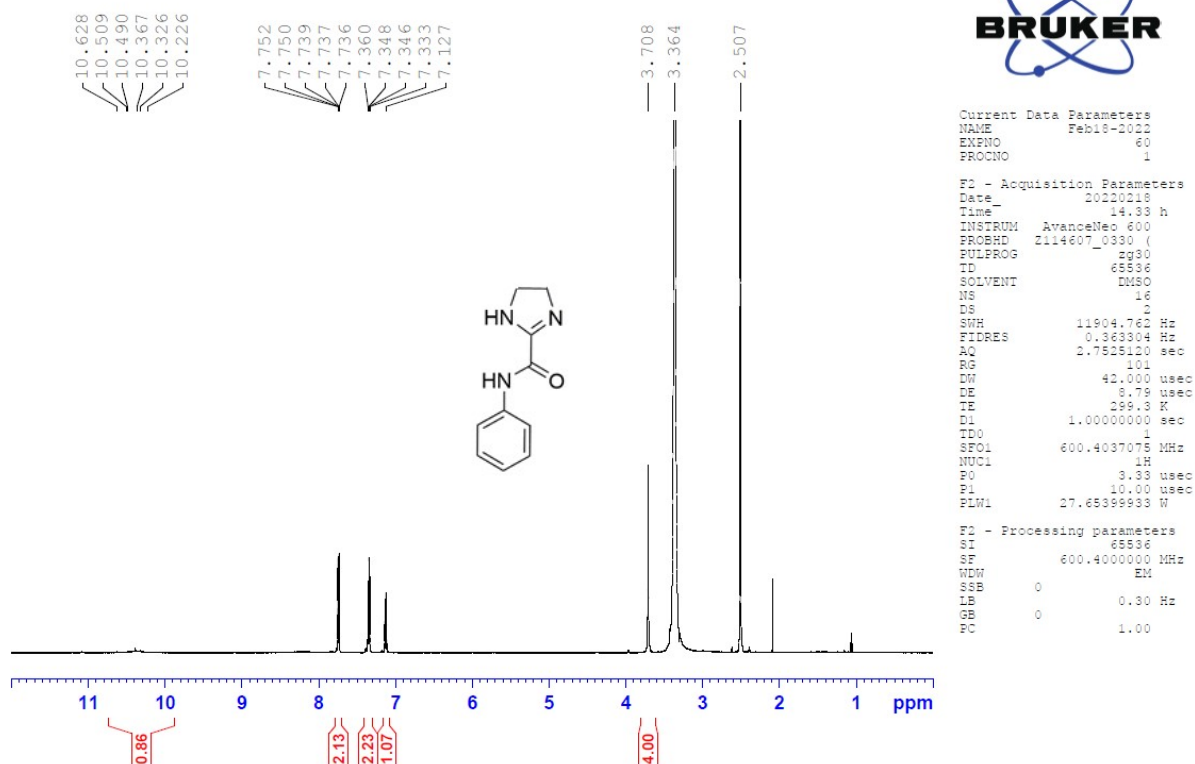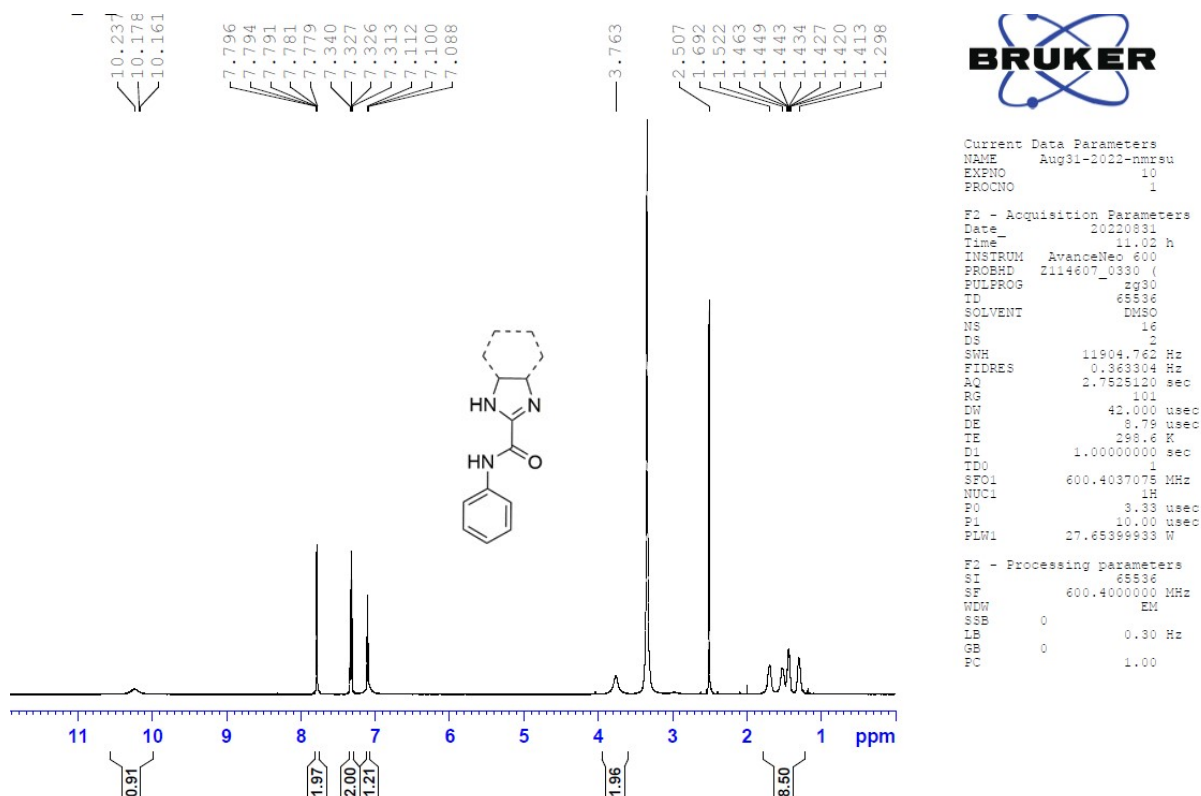

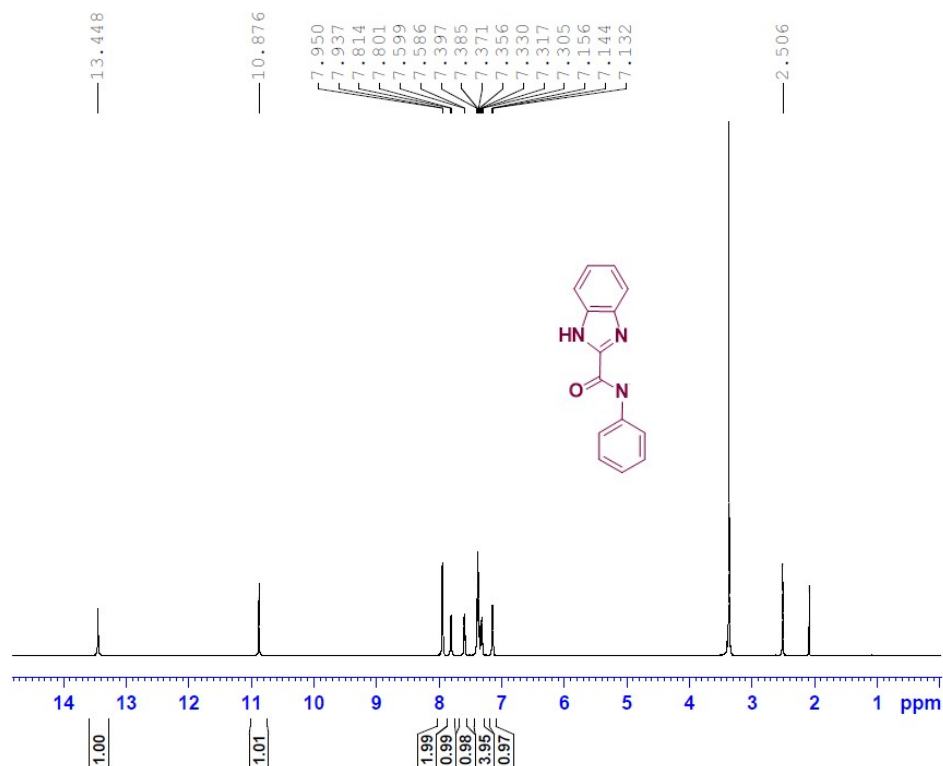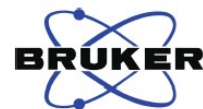

Current Data Parameters  
NAME Sep02-2022-nmr-su  
EXPNO 10  
PROCNO 1

F2 - Acquisition Parameters  
Date\_ 20220802  
Time\_ 10.48 h  
INSTRUM AvanceNeo 600  
PROBHD Zll4607\_0330 (   
PULPROG zg30  
TD 65536  
SOLVENT DMSO  
NS 16  
DS 2  
SWH 11904.762 Hz  
FIDRES 0.363304 Hz  
AQ 2.7525120 sec  
RG 101  
DM 42.000 usec  
DE 8.79 usec  
TE 299.3 K  
D1 1.00000000 sec  
TDO 1  
SFO1 600.4037075 MHz  
NUC1 1H  
PC 3.33 usec  
PL1 10.00 usec  
PLW1 27.65399933 W

F2 - Processing parameters  
SI 65536  
SF 600.4000000 MHz  
WDW EM  
SSB 0  
LB 0.30 Hz  
GB 0  
PC 1.00

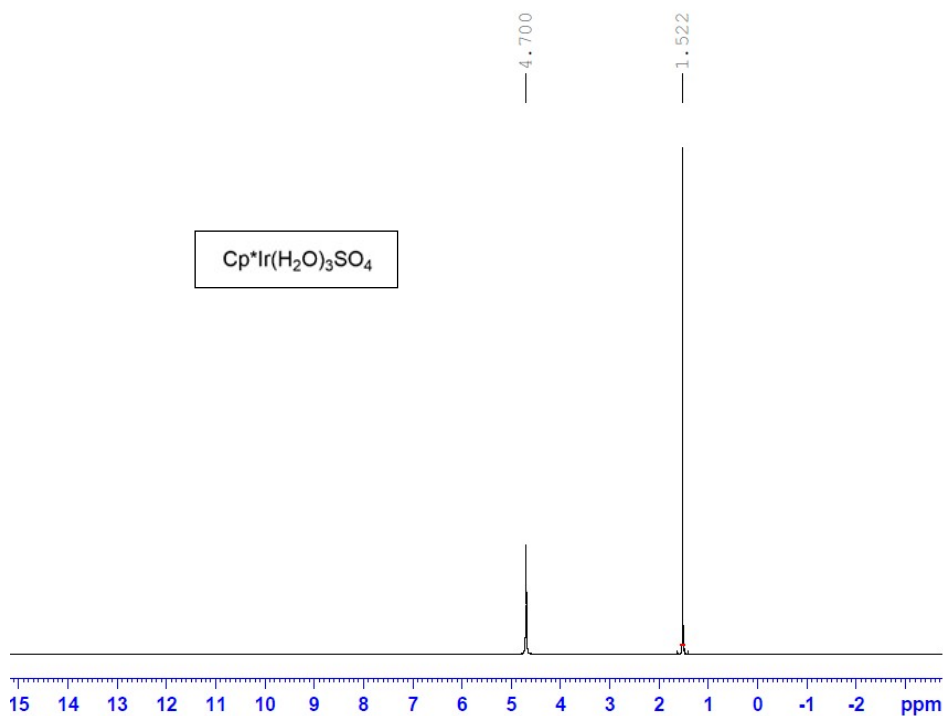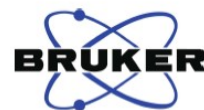

Current Data Parameters  
NAME Aug17-2022-nmr-su  
EXPNO 10  
PROCNO 1

F2 - Acquisition Parameters  
Date\_ 20220817  
Time\_ 12.44 h  
INSTRUM AvanceNeo 600  
PROBHD Zll4607\_0330 (   
PULPROG zg30  
TD 65536  
SOLVENT D2O  
NS 16  
DS 2  
SWH 11904.762 Hz  
FIDRES 0.363304 Hz  
AQ 2.7525120 sec  
RG 101  
DM 42.000 usec  
DE 8.79 usec  
TE 299.3 K  
D1 1.00000000 sec  
TDO 1  
SFO1 600.4037075 MHz  
NUC1 1H  
PC 3.33 usec  
PL1 10.00 usec  
PLW1 27.65399933 W

F2 - Processing parameters  
SI 65536  
SF 600.4000000 MHz  
WDW EM  
SSB 0  
LB 0.30 Hz  
GB 0  
PC 1.00

Ir cat\_Exp-198

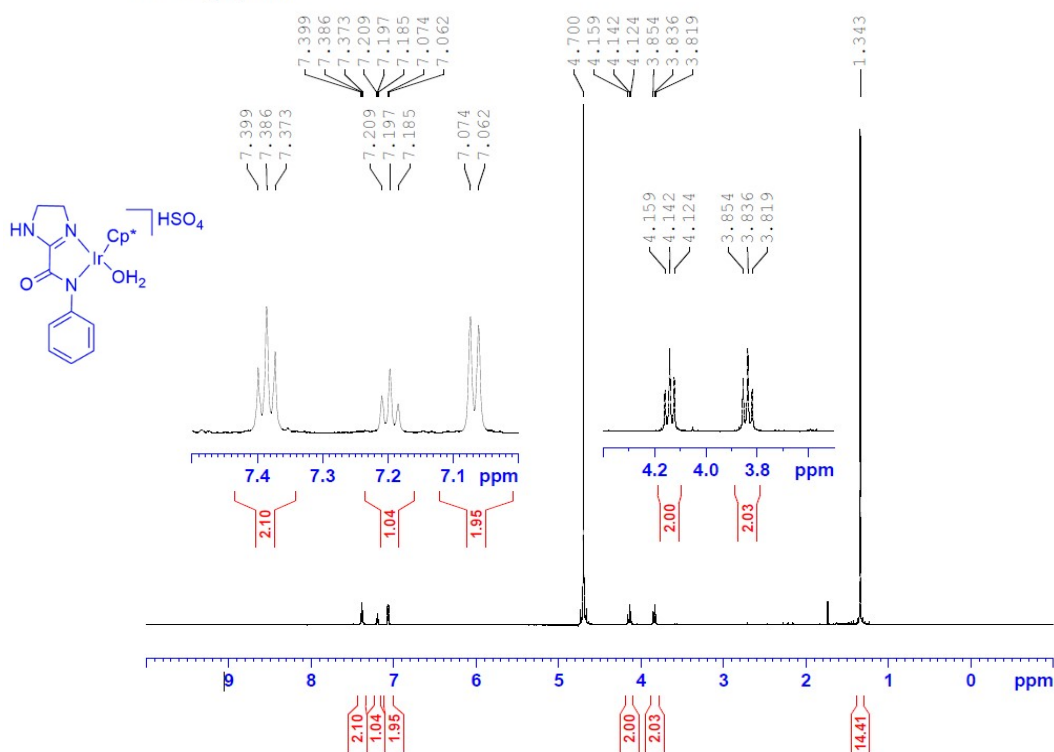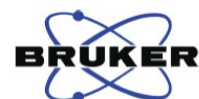

Current Data Parameters  
NAME May02-2022-nmr5u  
EXPNO 60  
PROCNO 1

F2 - Acquisition Parameters  
Date\_ 20220502  
Time 14.11 h  
INSTRUM AvanceNeo 600  
PROBHD Z114607\_0330 (   
PULPROG zgpg30  
TD 65536  
SOLVENT D2O  
NS 16  
DS 4  
SWH 11904.762 Hz  
FIDRES 0.363304 Hz  
AQ 2.7525120 sec  
RG 101  
DW 42.000 usec  
DE 8.79 usec  
TE 297.9 K  
D1 1.00000000 sec  
TD0 1  
SFO1 600.4037075 MHz  
NUC1 1H  
FO 3.33 usec  
PI 10.00 usec  
PLW1 27.65399933 W

F2 - Processing parameters  
SI 65536  
SF 600.4000011 MHz  
WDW EM  
SSB 0  
LB 0.30 Hz  
GB 0  
PC 1.00

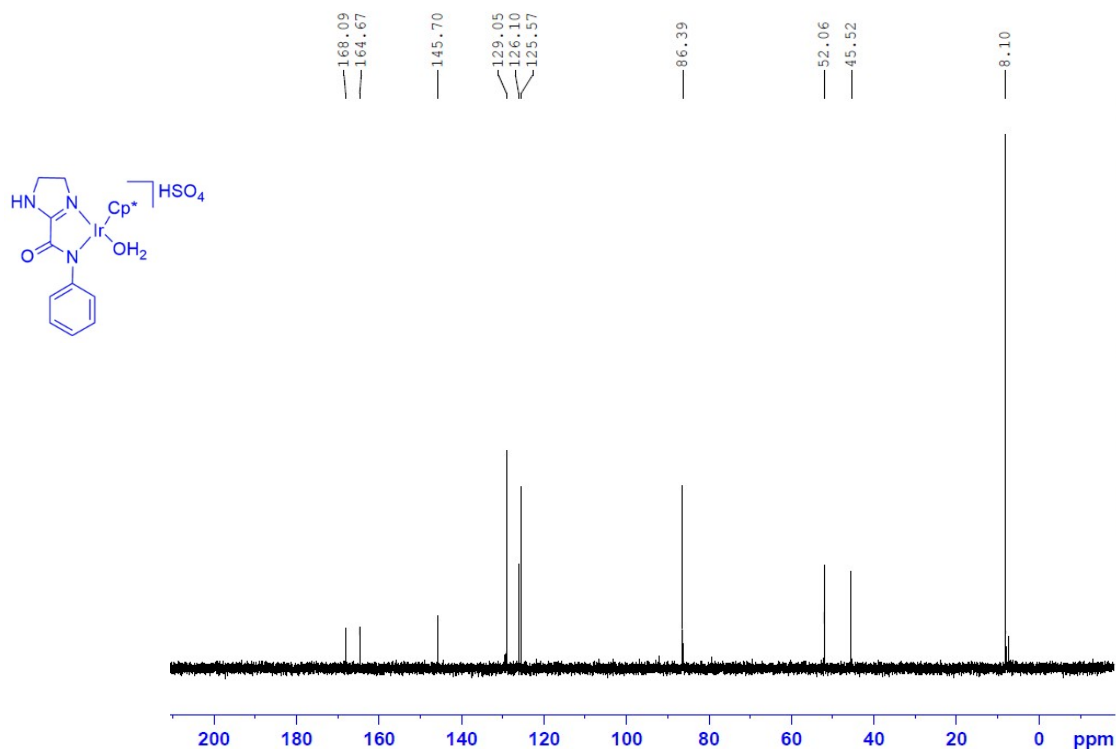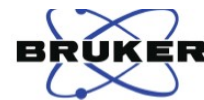

Current Data Parameters  
NAME May05-2022-nmr5u  
EXPNO 11  
PROCNO 1

F2 - Acquisition Parameters  
Date\_ 20220505  
Time 16.49 h  
INSTRUM AvanceNeo 600  
PROBHD Z114607\_0330 (   
PULPROG zgpg30  
TD 65536  
SOLVENT D2O  
NS 6144  
DS 4  
SWH 35714.285 Hz  
FIDRES 1.089913 Hz  
AQ 0.9175040 sec  
RG 101  
DW 14.000 usec  
DE 6.50 usec  
TE 299.3 K  
D1 2.00000000 sec  
D11 0.03000000 sec  
TD0 1  
SFO1 150.9857971 MHz  
NUC1 13C  
FO 4.00 usec  
PI 12.00 usec  
PLW1 82.27400208 W  
SFO2 600.4024016 MHz  
NUC2 1H  
CPDPRG2 waltz65  
PCPD2 70.00 usec  
PLW2 27.65399933 W  
PLW12 0.56436002 W  
PLW13 0.28387001 W

F2 - Processing parameters  
SI 32768  
SF 150.9707001 MHz  
WDW EM  
SSB 0  
LB 1.00 Hz  
GB 0  
PC 1.40



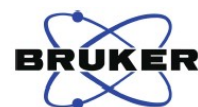

Current Data Parameters  
NAME Sep01-2022-nmr1  
EXPNO 50  
PROCNO 1

F2 - Acquisition Parameters  
Date\_ 20220901  
Time\_ 12:14 h  
INSTRUM AvanceNeo 600  
PROBHD Z114607\_0330 (   
PULPROG zg30  
TD 65536  
SOLVENT D2O  
NS 16  
DS 2  
SWH 11904.763 Hz  
FIDRES 0.363304 Hz  
AQ 2.7525120 sec  
RG 101  
DW 42.000 usec  
DE 3.79 usec  
TE 299.9 K  
D1 1.00000000 sec  
TDO 1  
SFO1 600.4037075 MHz  
NUC1 1H  
FO 3.33 usec  
PL1 10.00 usec  
PLW1 27.65399933 W

F2 - Processing parameters  
SI 65536  
SF 600.4000000 MHz  
WDW EM  
SSB 0  
GB 0  
PC 1.00

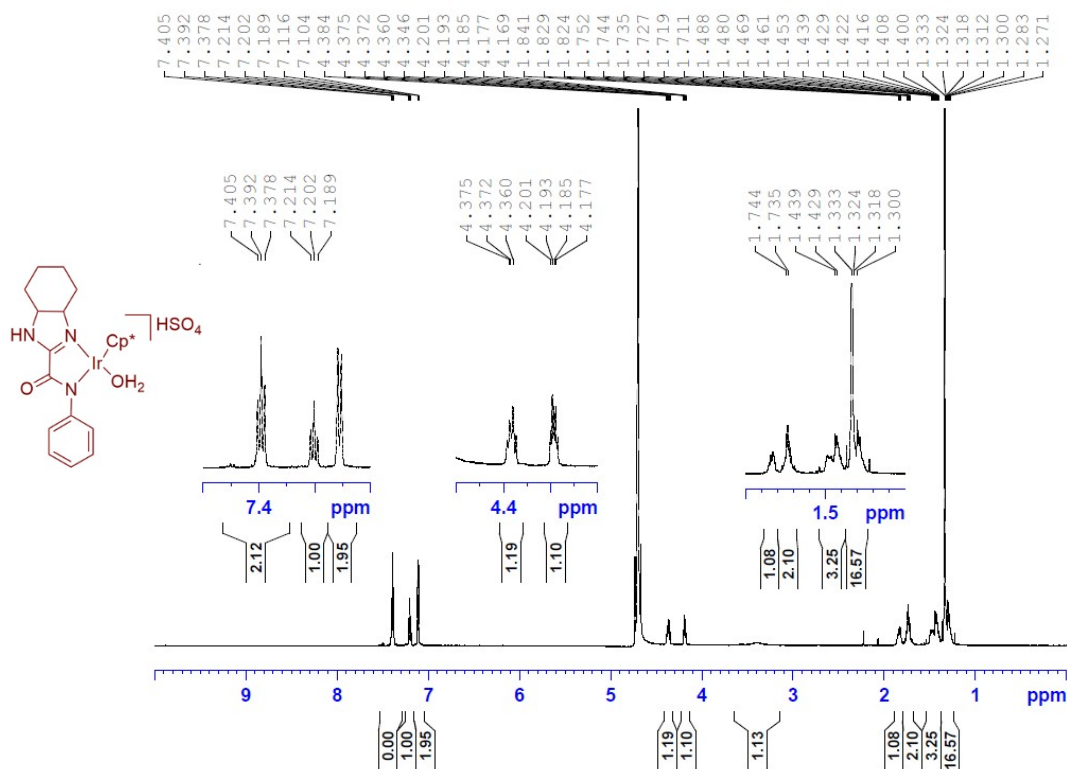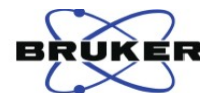

Current Data Parameters  
NAME Sep01-2022-nmr1  
EXPNO 51  
PROCNO 1

F2 - Acquisition Parameters  
Date\_ 20220901  
Time\_ 16:36 h  
INSTRUM AvanceNeo 600  
PROBHD Z114607\_0330 (   
PULPROG zgpg30  
TD 65536  
SOLVENT D2O  
NS 5120  
DS 4  
SWH 35714.285 Hz  
FIDRES 1.089913 Hz  
AQ 0.9175040 sec  
RG 101  
DW 14.000 usec  
DE 6.50 usec  
TE 299.9 K  
D1 2.00000000 sec  
D11 0.03000000 sec  
TDO 1  
SFO1 150.9857971 MHz  
NUC1 13C  
PO 4.00 usec  
PL 12.00 usec  
PLW1 82.27400208 W  
SFO2 600.4024016 MHz  
NUC2 1H  
CPDPRG2 waltz16  
PCPD2 70.00 usec  
PLW2 27.65399933 W  
PLW12 0.56436002 W  
PLW13 0.28387001 W

F2 - Processing parameters  
SI 32768  
SF 150.9707001 MHz  
WDW EM  
SSB 0  
GB 0  
PC 1.40

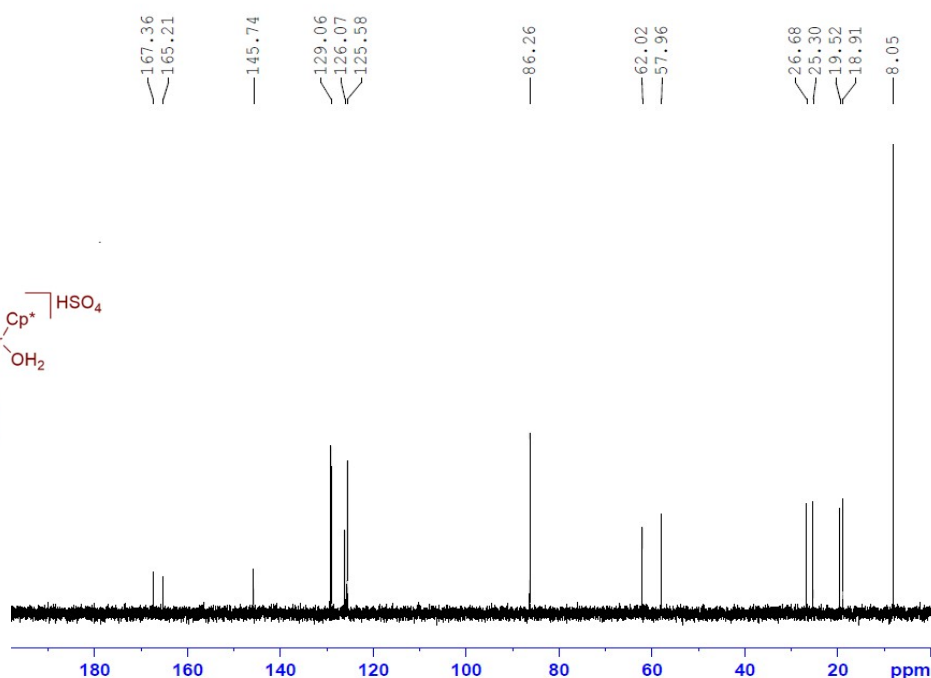

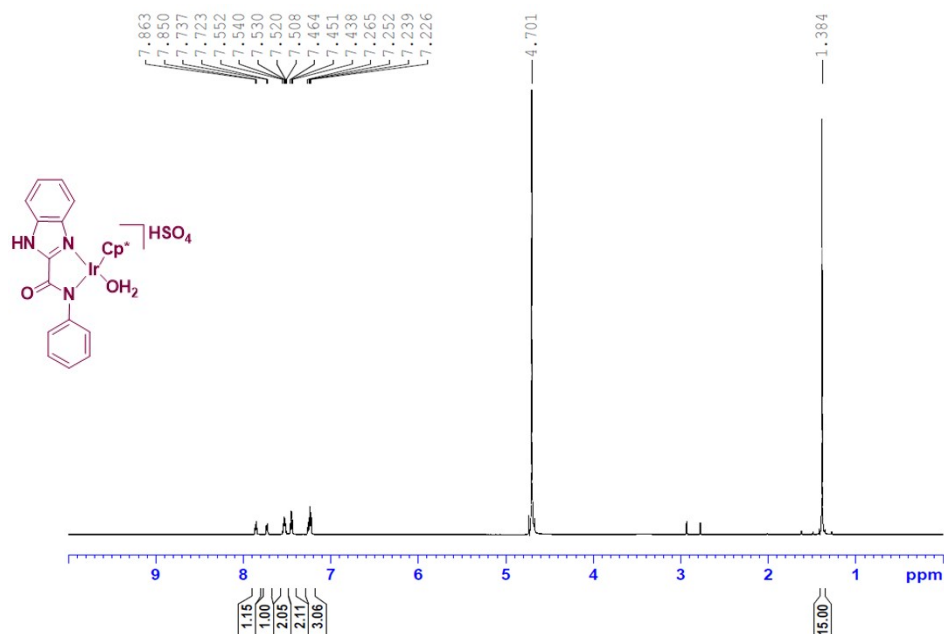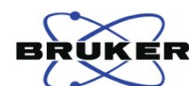

Current Data Parameters  
NAME Sep09-2022-nmrssu  
EXPNO 10  
PROCNO 1

F2 - Acquisition Parameters  
Date\_ 20220909  
Time 6.08 h  
INSTRUM AvanceNeo 600  
PROBHD Z114607\_0330 (4  
PULPROG zgpg30  
TD 65536  
SOLVENT D2O  
NS 16  
DS 4  
SWH 11904.762 Hz  
FIDRES 0.363304 Hz  
AQ 2.7525110 sec  
RG 101  
DM 42.000 usec  
DE 8.75 usec  
TE 299.1 K  
D1 1.00000000 sec  
TD0 1  
SFO1 600.4037075 MHz  
NUC1 1H  
FO 3.33 usec  
PL 10.00 usec  
PLW1 27.65339533 W

F2 - Processing parameters  
SI 65536  
SF 600.4000000 MHz  
WDW EM  
SSB 0  
LB 0.30 Hz  
GB 0  
PC 1.00

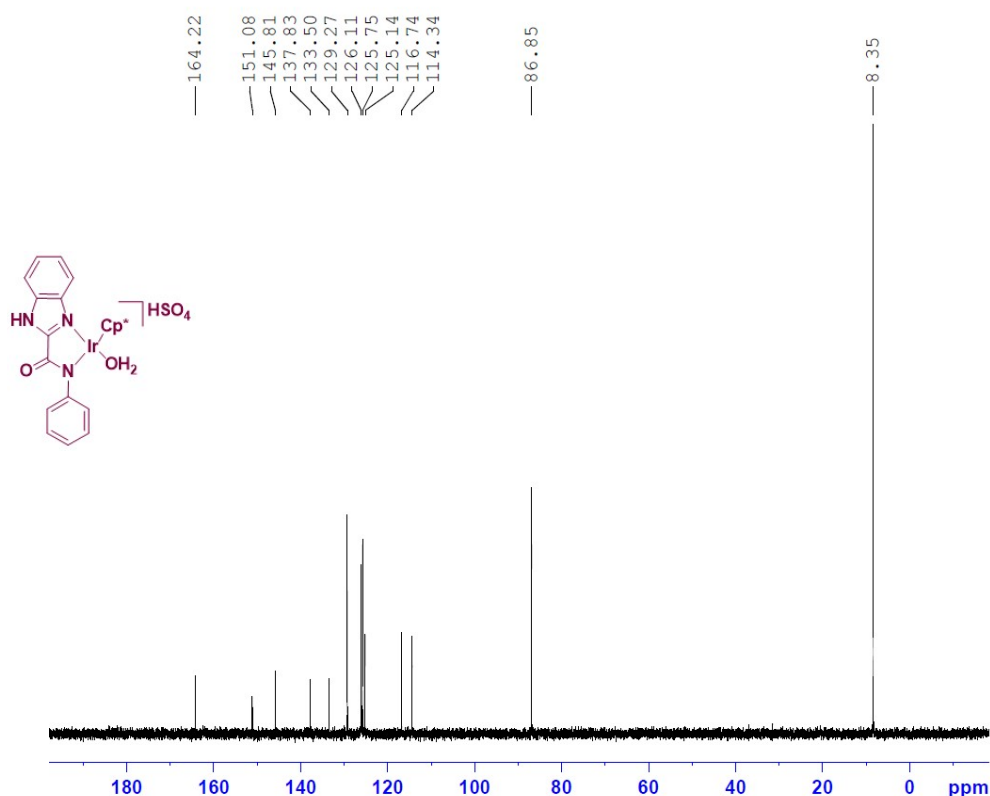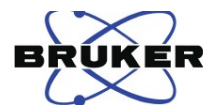

Current Data Parameters  
NAME Sep09-2022-nmrssu  
EXPNO 11  
PROCNO 1

F2 - Acquisition Parameters  
Date\_ 20220909  
Time 10.22 h  
INSTRUM AvanceNeo 600  
PROBHD Z114607\_0330 (4  
PULPROG zgpg30  
TD 65536  
SOLVENT D2O  
NS 5120  
DS 4  
SWH 35714.285 Hz  
FIDRES 1.089913 Hz  
AQ 0.9175040 sec  
RG 101  
DM 14.000 usec  
DE 6.50 usec  
TE 299.6 K  
D1 2.00000000 sec  
D11 0.03000000 sec  
TD0 1  
SFO1 150.9857971 MHz  
NUC1 13C  
FO 4.00 usec  
PL 12.00 usec  
PLW1 82.27400208 W  
SFO2 600.4024016 MHz  
NUC2 1H  
CPDPRG2 waltz165  
PCPD2 70.00 usec  
PLW2 27.65339533 W  
PLW12 0.56436002 W  
PLW13 0.28387001 W

F2 - Processing parameters  
SI 32768  
SF 150.9707001 MHz  
WDW EM  
SSB 0  
LB 1.00 Hz  
GB 0  
PC 1.40

## 1. Reaction mixture of CO<sub>2</sub> hydrogenation to formate

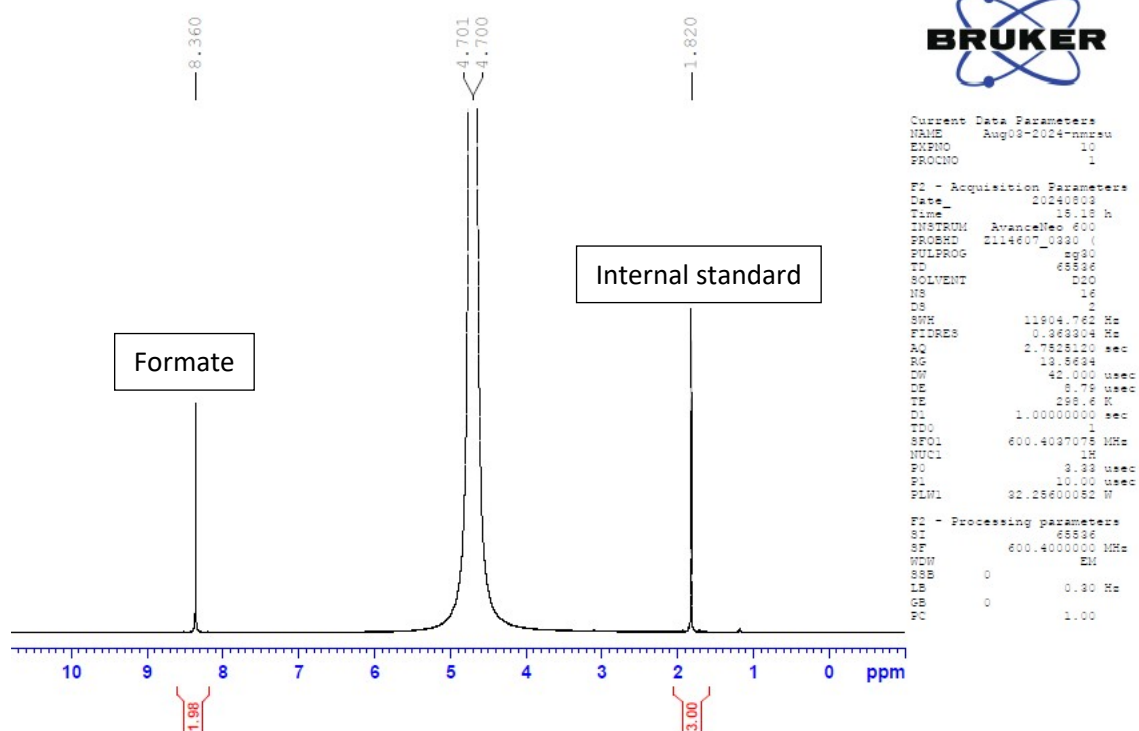

## 2. Reaction mixture of integrated CO<sub>2</sub> capture with triethylamine and hydrogenation to formate

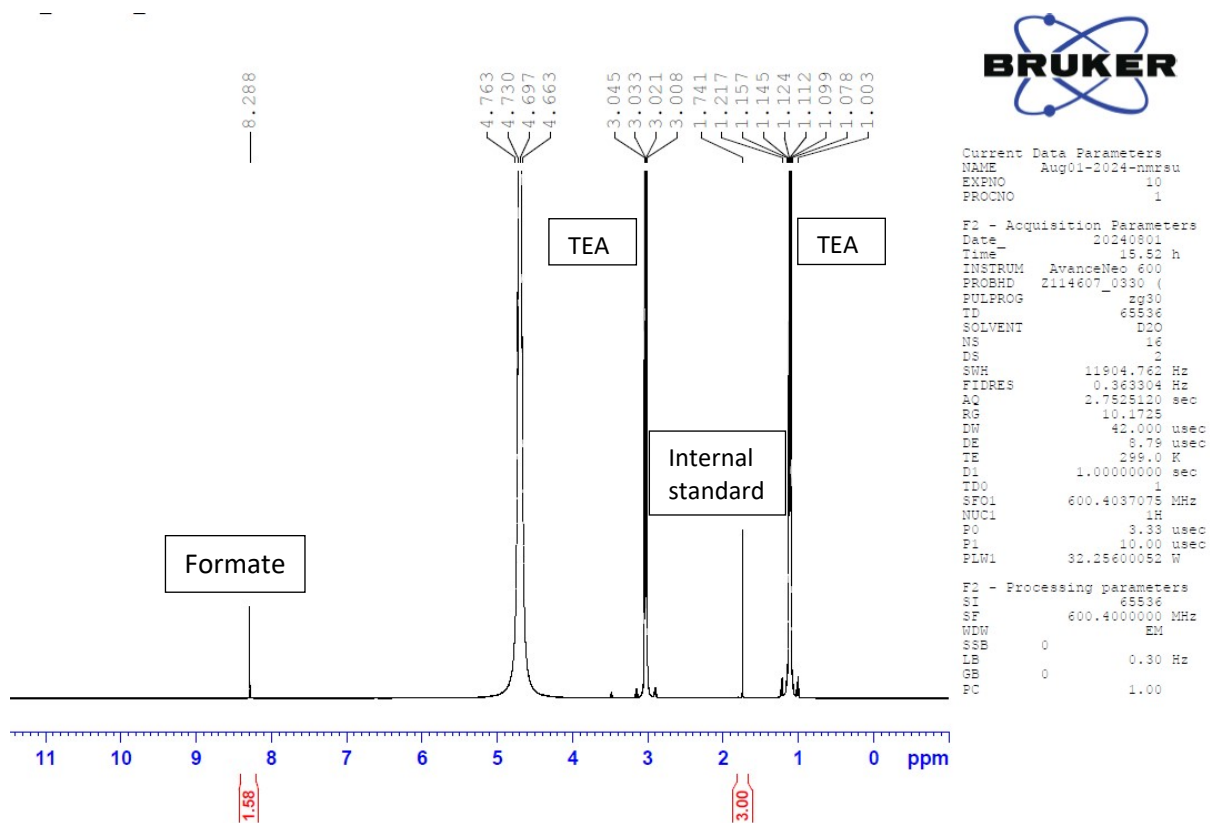

## 4. References

1. G. Mariappan, S. Alam, L. Sutharson, P. K. Haldar, and S. Nath, *Ind. J. Chem*, 2013, **52B**, 568-572;
2. I. V. Zavarzin, V. N. Yarovenko, A. V. Shirokov, N. G. Smirnova, A. A. Eskov, and M. M. Krayushk, *ARKIVOC*, 2003, **(xiii)**, 205-223.
3. P. A. Thakurdesai, S. G. Wadodkar, and C. T. Chopade, *Pharmacologyonline*, 2007, **1**, 314-329.
